# Supplementary material for: Doping-induced detection and determination of propellant grade hydrazines by a kinetic spectrophotometric method based on nano and conventional polyaniline using halide ion releasing additives
Source: Royal Society of Chemistry journal article supplement (doi:10.1039/c4ra02296c), 2014-01-01
Supplement: c4ra02296c1.pdf [file c4ra02296c1.pdf]

## Electronic Supplementary Information

### **“Doping-induced Detection and Determination of Propellant Grade Hydrazines by Kinetic Spectrophotometric Method based on Nano and Conventional Polyaniline using Halide ion Releasing Additives”**

by

***Selvakumar Subramanian<sup>\*</sup>,<sup>1</sup>, Somanathan Narayanasastri<sup>2</sup> and Audishesha Reddy Kami Reddy<sup>1</sup>***

*<sup>1</sup>Chemical Testing Lab, Solid Propellant Space Booster Plant,  
SDSC-SHAR Centre,  
Indian Space Research Organization (ISRO),  
Sriharikota 524124, Andhra Pradesh, India  
Tel.: +91-8623-223013; fax: +91-8623-225154  
E-mail: selvakumar.s@shar.gov.in , kumarreka@hotmail.com*

*<sup>2</sup>Polymer Division, Central Leather Research Institute (CLRI),  
Council of Scientific and Industrial Research (CSIR),  
Adyar, Chennai 600020, Tamil Nadu, India*

\* To whom correspondence should be addressed.

## 1. Chemical Structures

Chemical Structures of Hydrazine, Monomethylhydrazine and Unsymmetrical dimethylhydrazine are given as follows. For Hydrazine hydrate, water molecule is present in the hydrated form of Hydrazine.

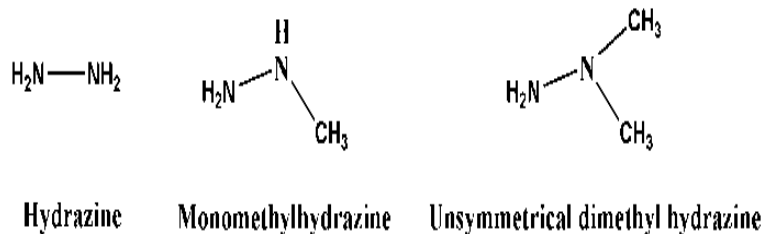

## 2. Characterization

Spectrophotometric measurements were performed on a UV–VIS spectrophotometer (Techcomp-8500) in the wavelength range of 200–900 nm with 1 cm quartz cells thermostated by a thermostatic water bath (Shimadzu-TB 85) at 50 °C and 60 °C. The morphology of conventional and nano Pani was characterized by using the field emission scanning electron microscopy (FESEM, SIRION-Netherland). Wide-angle X-ray diffraction (WAXD) for sample powders was carried out at room temperature by using a Rigaku D / max 2500 VPC X-ray diffractometer with Cu-K<sub>α</sub> irradiation and scan speed of 5 °C. All the kinetic data were obtained from the plots using the program Microcal Origin 7.0. A stopwatch was applied to record the reaction time. *N*-methyl-2-pyrrolidone was used as a solvent to prepare sample solutions of Pani.

## 3. Characterization by FT-IR and UV- Vis Spectras :

FT-IR spectra of the conventional Pani-EB in NMP shows five peaks, at 1585 cm<sup>-1</sup> (C=N stretching of the quinoid ring), at 1494 cm<sup>-1</sup> (stretching of the benzenoid ring), at 1310 cm<sup>-1</sup> (C-N stretching of the benzenoid ring), at 1162 cm<sup>-1</sup> (in-plane C-H bending motion of the quinoid ring) and at 829 cm<sup>-1</sup> (out-of-plane bending of C-H bond in the aromatic ring). The peaks identified are consistent with previously published data<sup>1</sup>. FT-IR spectra of the nano Pani-EB taken in KBr Pellet form also shows these main five peaks (1578, 1492, 1295, 1147 & 824 cm<sup>-1</sup>). Slight variation in peak positions of samples taken in KBr pellet and NMP medium is due to solvent (NMP) effect.

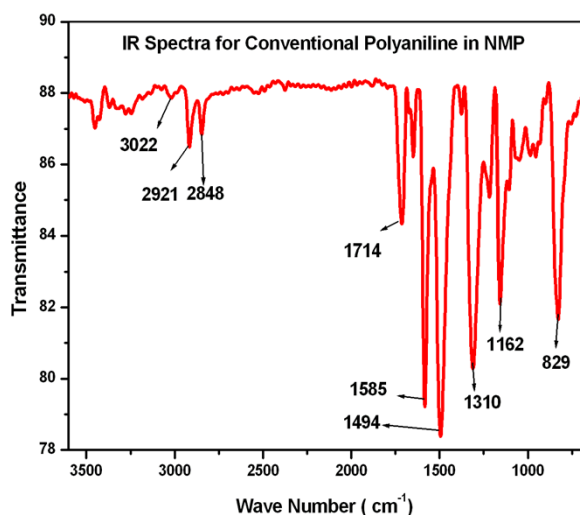

Fig.S1 FT-IR spectra of conventional Pani in NMP medium

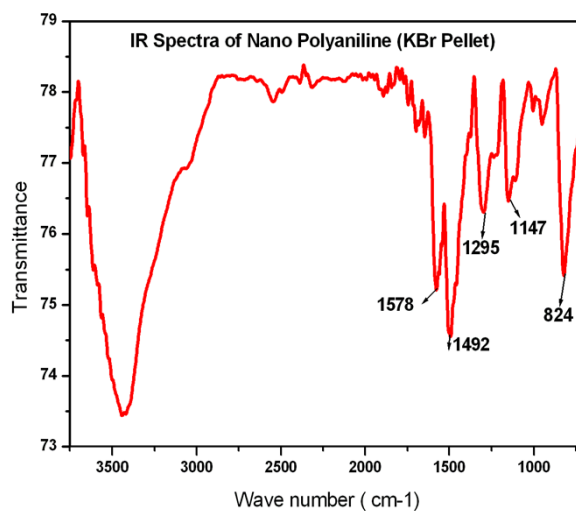

Fig.S2 FT-IR spectra of nano Pani in KBr Pellet form

UV-Vis spectroscopy analysis of these two forms shows two absorption peaks at 326 and 626 nm (Fig.6 of manuscript) which can be assigned to the  $\pi-\pi^*$  transition of the benzenoid ring and the exciton absorption of the quinoid ring respectively. The peaks identified are consistent with previously published data<sup>1</sup>.

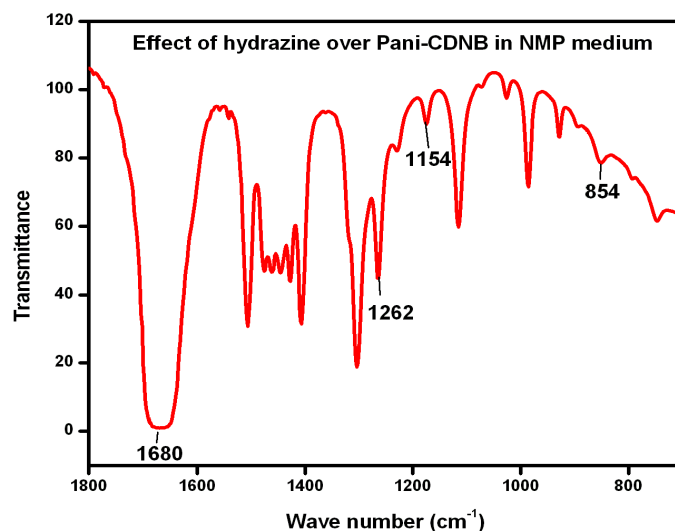

Fig.S3 FT-IR spectra-Hydrazine effect over Pani-CDNB in NMP medium

FT-IR spectra of Pani-ES (taken in NMP medium) formed by the release of HCl (Figure S3) shows new peaks at 1154 and 854  $\text{cm}^{-1}$ . Peak at 1154  $\text{cm}^{-1}$  indicates the broken symmetry mode of the quinoid ring. Peak at 854  $\text{cm}^{-1}$  (out of plane bending of the aromatic ring) indicates the change from the quinonoid structure to the benzenoid structure upon doping<sup>1</sup>.

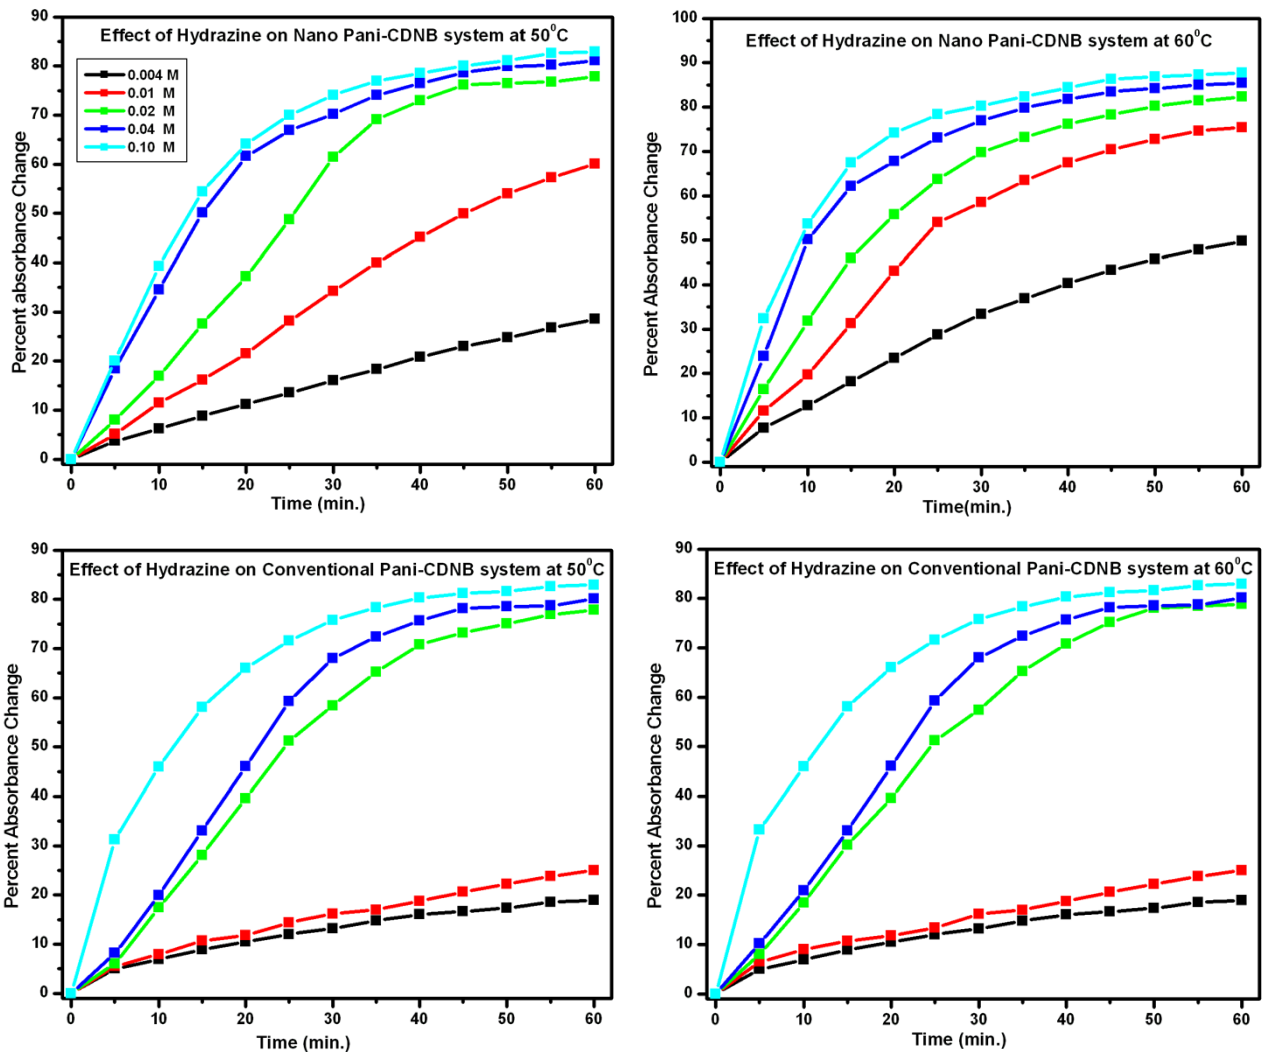

Fig. S4. Percent absorbance change-Time curves for nano and conventional Pani – CDNB systems for the addition of hydrazine at different concentrations (at 50 °C & 60 °C)

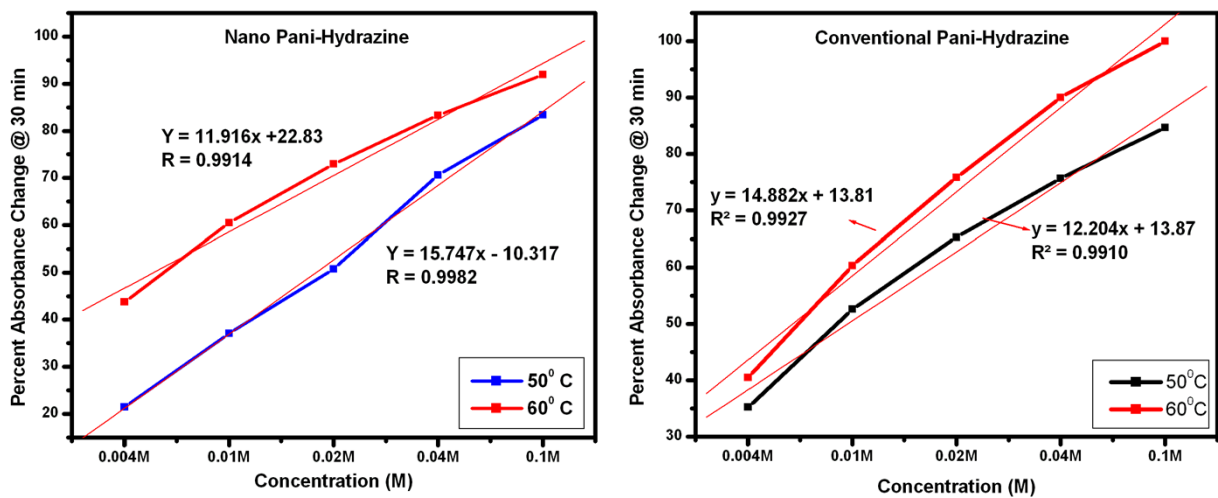

Fig.S5. Calibration graphs of percent absorbance change recorded at 30 min.Vs concentration of hydrazine at 50 °C & 60 °C

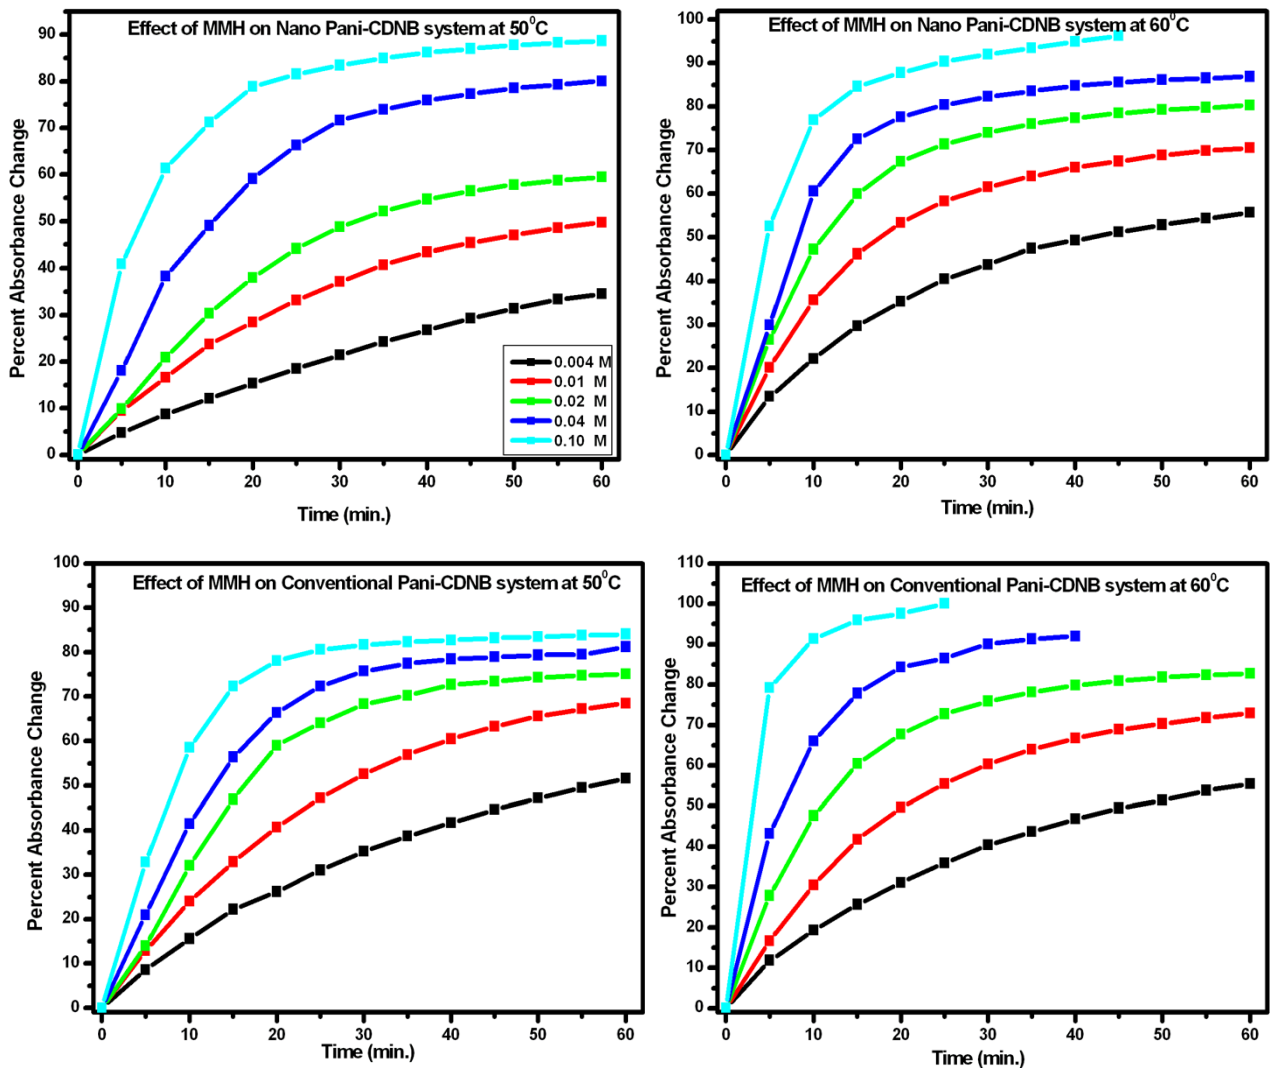

Fig. S6. Percent absorbance change-Time curves for nano and conventional Pani – CDNB systems for the addition of MMH at different concentrations (at 50 °C and 60 °C)

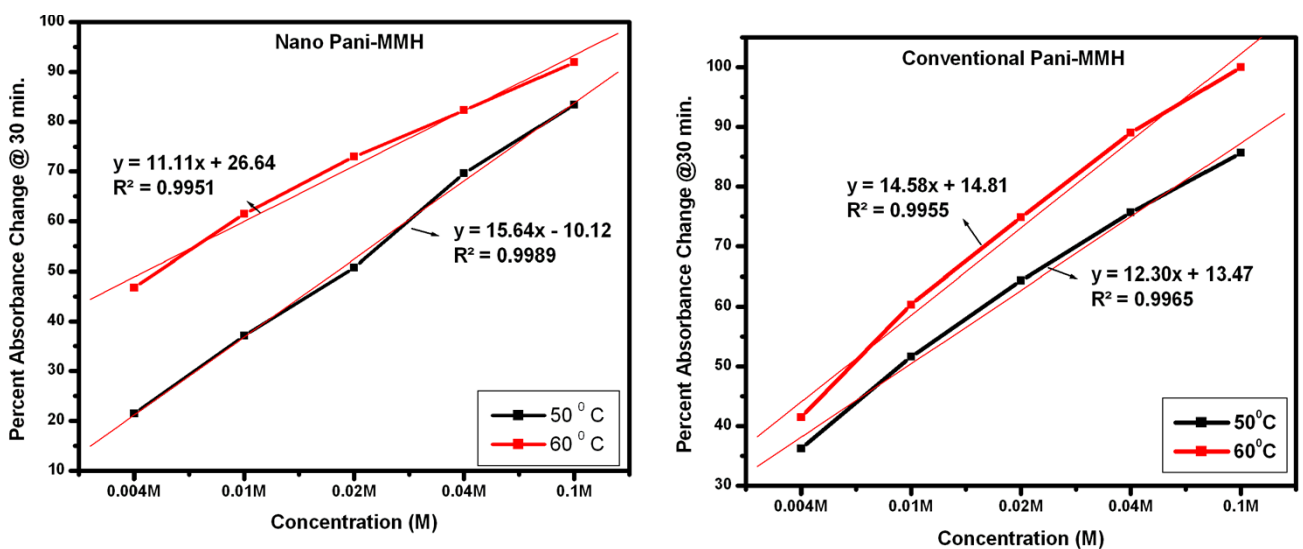

Fig.S7. Calibration graphs of percent absorbance change recorded at 30 min. Vs concentration of MMH at 50 °C & 60 °C

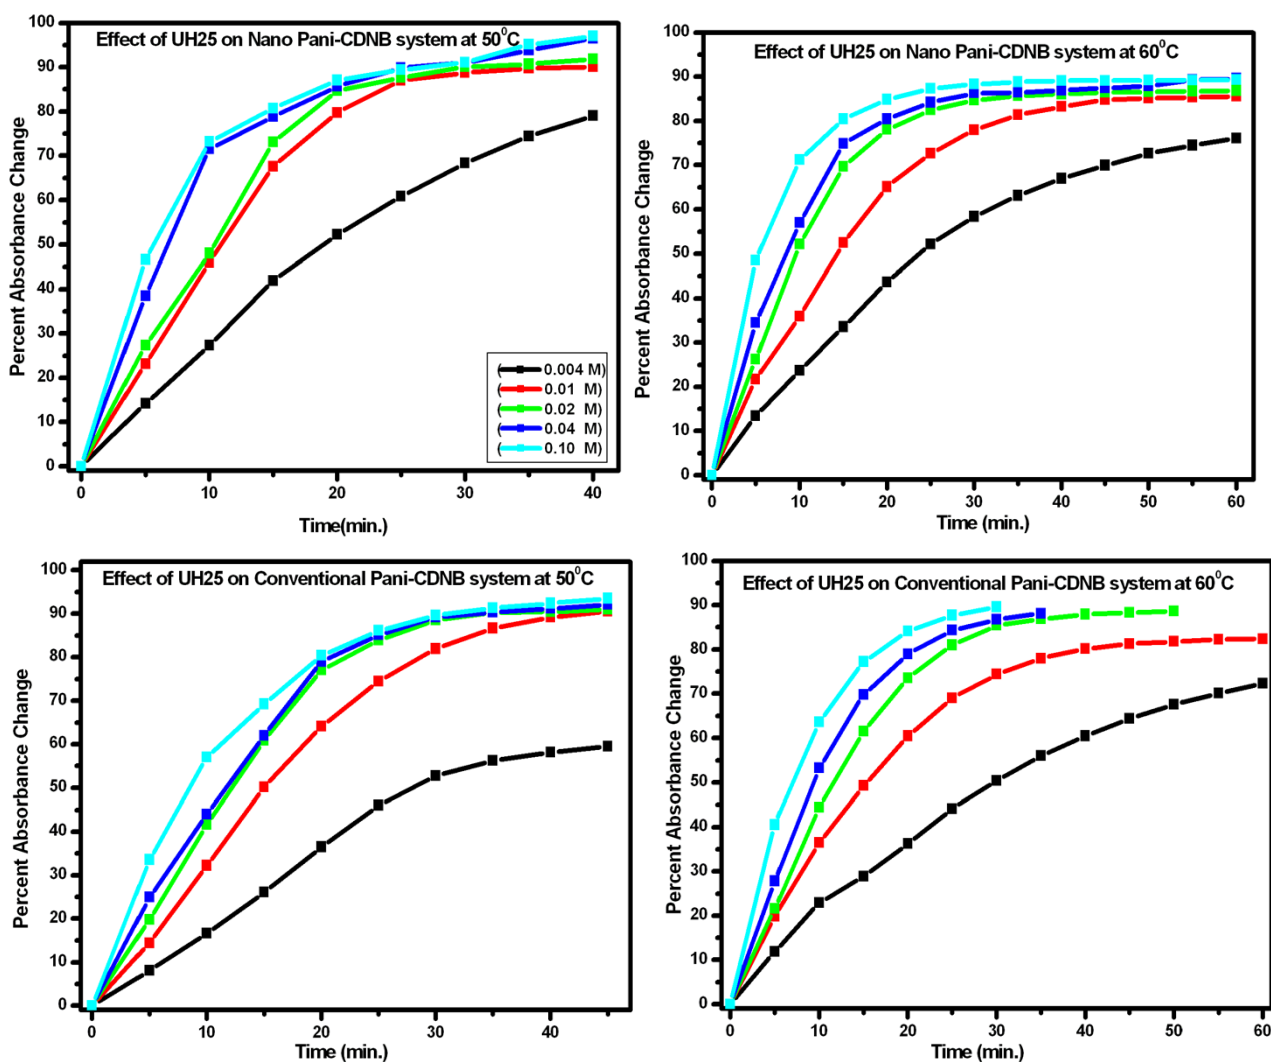

Fig.S8. Percent absorbance change-Time curves for nano and conventional Pani – CDNB systems for the addition of UH25 at different concentrations (at 50 °C and 60 °C)

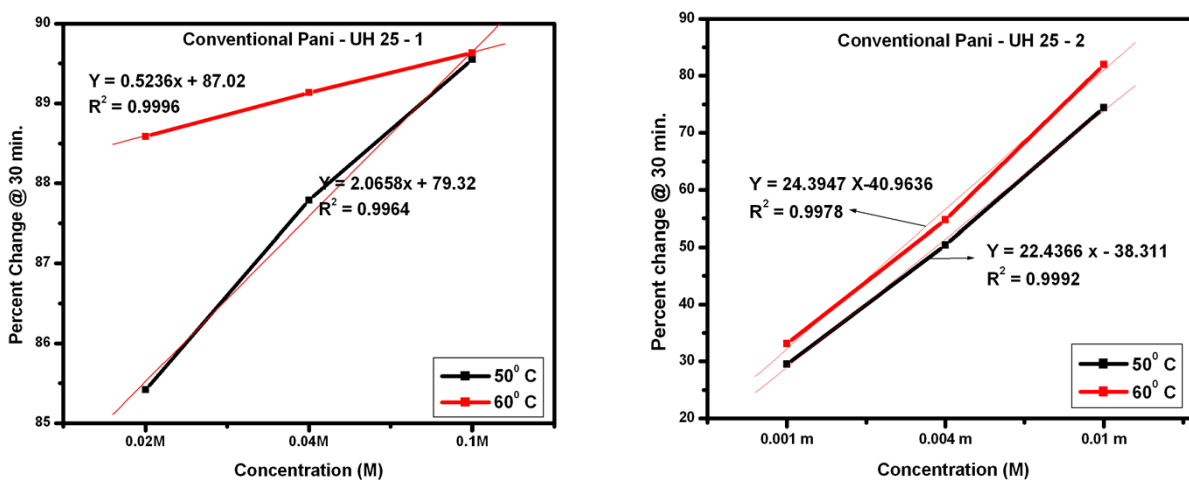

Fig.S9. Calibration graphs of percent absorbance change recorded at 30 min. Vs concentration of UH25 at 50 °C and 60 °C

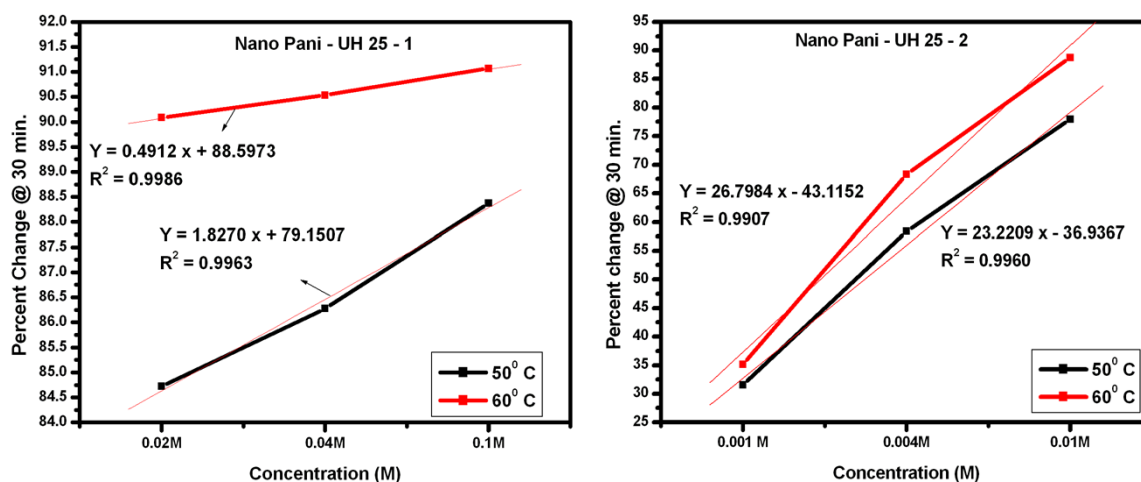

Fig.S10. Calibration graphs of percent absorbance change recorded at 30 min. Vs concentration of UH25 at 50 °C and 60 °C

**Table S1 Statistical data obtained from fixed time method (15 min.) for the addition of hydrazine, MMH and UH25 @ 50°C & 60°C**

| Concentration (M)               | Hydrazine    |                                | MMH          |                                | UH25         |                                |
|---------------------------------|--------------|--------------------------------|--------------|--------------------------------|--------------|--------------------------------|
| <b>Nano Pani @ 50°C</b>         |              |                                |              |                                |              |                                |
|                                 | <b>Slope</b> | <b>Correlation Coefficient</b> | <b>Slope</b> | <b>Correlation Coefficient</b> | <b>Slope</b> | <b>Correlation Coefficient</b> |
| <b>0.004</b>                    | 2.89         | 0.9901                         | 4.02         | 0.9947                         | 11.09        | 0.9943                         |
| <b>0.01</b>                     | 5.49         | 0.9973                         | 7.82         | 0.9948                         | 17.16        | 0.9922                         |
| <b>0.02</b>                     | 9.17         | 0.9958                         | 10.19        | 0.9993                         | 23.5         | 0.9919                         |
| <b>0.04</b>                     | 16.64        | 0.9984                         | 16.73        | 0.9858                         | 24.69        | 0.977                          |
| <b>0.1</b>                      | 18.26        | 0.9959                         | 23.39        | 0.9173                         | 26.41        | 0.8988                         |
| <b>Nano Pani @ 60°C</b>         |              |                                |              |                                |              |                                |
| <b>0.004</b>                    | 5.95         | 0.99                           | 9.77         | 0.9807                         | 13.88        | 0.9996                         |
| <b>0.01</b>                     | 10           | 0.9816                         | 15.41        | 0.9812                         | 18.57        | 0.9997                         |
| <b>0.02</b>                     | 15.31        | 0.9988                         | 20.05        | 0.9767                         | 24.01        | 0.9974                         |
| <b>0.04</b>                     | 21.77        | 0.9733                         | 24.85        | 0.9691                         | 26.97        | 0.9321                         |
| <b>0.1</b>                      | 22.37        | 0.9663                         | 27.83        | 0.8841                         | 26.88        | 0.9043                         |
| <b>Conventional Pani @ 50°C</b> |              |                                |              |                                |              |                                |
| <b>0.004</b>                    | 2.87         | 0.9949                         | 3.34         | 0.9961                         | 8.66         | 0.9987                         |
| <b>0.01</b>                     | 3.05         | 0.9984                         | 6.99         | 0.9936                         | 16.84        | 0.9973                         |
| <b>0.02</b>                     | 9.08         | 0.9952                         | 12.89        | 0.9976                         | 20.42        | 0.9994                         |
| <b>0.04</b>                     | 13.59        | 0.9708                         | 15.96        | 0.9943                         | 20.49        | 0.9938                         |
| <b>0.1</b>                      | 16.68        | 0.8883                         | 22.26        | 0.9697                         | 23.1         | 0.9591                         |
| <b>Conventional Pani @ 60°C</b> |              |                                |              |                                |              |                                |
| <b>0.004</b>                    | 5.75         | 0.9377                         | 8.45         | 0.9778                         | 9.76         | 0.9802                         |
| <b>0.01</b>                     | 6.54         | 0.9325                         | 13.92        | 0.9825                         | 16.43        | 0.9907                         |
| <b>0.02</b>                     | 14.19        | 0.9934                         | 20.11        | 0.9726                         | 20.73        | 0.9966                         |
| <b>0.04</b>                     | 19.2         | 0.9897                         | 25.64        | 0.929                          | 23.48        | 0.9877                         |
| <b>0.1</b>                      | 21.13        | 0.9295                         | 30.19        | 0.7385                         | 25.47        | 0.946                          |

**Table S2 Determination of hydrazine, MMH and UH25 in tap water by nano & conventional Pani systems @ 50°C (n=4)**

| Pani                   | Hydrazine         |            | MMH               |            | UH25              |          |
|------------------------|-------------------|------------|-------------------|------------|-------------------|----------|
|                        | Added*<br>(mg/ml) | RSD<br>%   | Added*<br>(mg/ml) | RSD<br>%   | Added*<br>(mg/ml) | RSD<br>% |
| Nano – Trial 1         | 3.3               | <b>1.1</b> | 24.2              | <b>0.7</b> | 60.3              | 1.5      |
| Nano – Trial 2         | 1.8               | <b>1.2</b> | 47.6              | <b>1.2</b> | 30.5              | 1.2      |
| Conventional – Trial 1 | 3.4               | <b>0.8</b> | 23.8              | <b>0.9</b> | 30.1              | 1.1      |
| Conventional – Trial 2 | 1.9               | <b>0.9</b> | 46.6              | <b>0.8</b> | 59.5              | 0.9      |

\* mg/ml of respective hydrazine added to the respective Pani – CDNB system  
n = No. of determinations for particular concentrations tried.

### References:

1. L. Trachiwin, P.Kiattibutr, L.Ruangchuay, A.Sirivat and J. Schwank, *Synthetic Met.*, 2002, **129**, 303.
